# Gender differences in symptoms of myocardial ischaemia

Martha H. Mackay\*, Pamela A. Ratner, Joy L. Johnson, Karin H. Humphries, and Christopher E. Buller

School of Nursing, University of British Columbia, St Paul's Hospital, B342, 1081 Burrard St, Vancouver, British Columbia, Canada V6Z 1Y6

Received 17 January 2011; revised 15 August 2011; accepted 19 August 2011; online publish-ahead-of-print 14 September 2011

See page 3064 for the editorial comment on this article (doi:10.1093/eurheartj/ehr272)

## Aims

Better understanding of symptoms of myocardial ischaemia is needed to improve timeliness of treatment for acute coronary syndromes (ACS). Although researchers have suggested sex differences exist in ischaemic symptoms, methodological issues prevent conclusions. Using percutaneous coronary intervention (PCI) balloon inflation as a model of myocardial ischaemia, we explored sex differences in reported symptoms of ischaemia.

## Methods and results

Patients having non-emergent PCI, but not haemodynamic instability or left bundle branch block or non-acute coronary occlusion, were prospectively recruited. Pre-procedure, descriptions of pre-existing symptoms were obtained using open-ended questioning. Inflation was maintained for 2 min or until moderate discomfort or clinical instability occurred. During inflation, subjects were exhaustively questioned about their symptoms. Concurrent ECG data were collected. The final sample was 305 [39.7% women; mean age 63.9 ( $\pm$  10.6)]. No sex differences were found in rates of chest or typical ischaemic discomfort, regardless of ischaemic status. Women were significantly more likely to report throat/jaw discomfort [odds ratio: 2.91; 95% confidence interval: 1.58–5.37] even after statistical adjustment for clinical and demographic variables.

## Conclusion

This prospective study with ECG-affirmed ischaemia found no statistically significant differences in women's and men's rates of chest and other typical symptoms during ischaemia, although women were more likely to experience throat and jaw discomfort. Currently both popular press and some patient education materials suggest women experience myocardial ischaemia differently from men. Steps to ensure women and health professionals are alert for the classic symptoms of myocardial ischaemia in women, as well as men, may be warranted.

## Keywords

Acute coronary syndrome • Acute myocardial infarction • Symptoms • Sex and gender differences

Observational studies have previously suggested sex-based differences in symptoms of myocardial ischaemia.<sup>1–10</sup> Failure to efficiently recognize ischaemic symptoms in women could partly explain delays in presentation,<sup>11–14</sup> diagnosis, and lower rate of treatment to guidelines observed in women.<sup>8</sup>

Diagnosis of ischaemia using clinical history is limited by a patient's recall of symptom characteristics, their inherent subjectivity, and by biases among care providers. Electrocardiographic verification of ischaemia for described episodes is usually unavailable. Even when obstructive coronary artery disease is conclusively documented, attributing index symptoms to the ischaemic substrate can be imprecise. Thus, there remains uncertainty as to

whether reported sex-based differences in ischaemic symptoms are due to biological differences, gender differences, patient or provider bias, flawed research methods, or other factors.

Few researchers have prospectively characterized sex-specific symptoms during objective ischaemia.<sup>15,16</sup> Our objective, therefore, was to determine the nature of symptoms provoked by discrete episodes of ischaemia produced by transient coronary occlusion during percutaneous coronary intervention (PCI) and to determine, in this controlled setting, whether sex differences exist.<sup>17–20</sup> To achieve this we employed a standardized balloon inflation protocol and concurrent questionnaire administration during routine PCI.

\* Corresponding author. Tel: +1 604 682 2344, Fax: +1 604 806 9150, Email: mmackay@providencehealth.bc.ca

Published on behalf of the European Society of Cardiology. All rights reserved. © The Author 2011. For permissions please email: journals.permissions@oup.com

## Methods

### Design and subjects

Beginning in October 2003, potentially eligible patients at two university-affiliated centres in Vancouver, Canada were screened, including those undergoing scheduled elective (required within 4 months) or urgent (required during current hospitalization) but not emergent (immediately) PCI, or coronary angiography with provisional PCI. In the latter case, final eligibility required that a PCI was performed. Exclusions were (i) emergent PCI [evolving myocardial infarction (MI) or refractory ischaemia]; (ii) baseline occlusion of the target lesion [Thrombolysis in Myocardial Infarction (TIMI) grade 0 or 1 flow] (iii) haemodynamic or electrical instability, or (iv) inability to converse in English. Participants were informed that the intent was to examine ischaemic symptoms provoked by PCI, but were blinded to the sex-specific nature of the analysis, to avoid reporting bias, and gave written, informed consent.

### Assessment of symptoms

Before entering the catheterization laboratory, subjects were questioned using a standardized tool regarding the intensity (on a 0–10 scale), location and quality of all symptoms they attributed to their heart that had led to their angiography or PCI referral ('baseline' symptoms). Overlapping patient-reported descriptors were later grouped using clinical and etymological knowledge (e.g. 'across chest' and 'front of chest' became 'chest discomfort'; 'heartburn', 'indigestion' became 'epigastrium/indigestion/heartburn'). Analysis employed the commonly used taxonomy for ischaemic symptoms. Typical symptoms were defined as either: chest, arm(s), shoulder, jaw, back or epigastric discomfort; shortness of breath; diaphoresis; weakness; indigestion; nausea or vomiting; dizziness or lightheadedness; fear or restlessness.<sup>21–23</sup>

The PCI proceeded in standard fashion, except balloon inflation was prolonged to a maximum of 2 min so as to produce symptomatic and/or electrocardiographic ischaemia. Throughout balloon inflation, subjects were re-questioned about active symptoms using the same tool. Inflation was terminated before 2 min for greater than moderate symptom severity, or insipient electrical or haemodynamic instability.

### Assessment of ischaemia

A multi-lead ECG recording (leads I, II, III, aVR, aVF, and either V<sub>2</sub> or V<sub>3</sub>) was obtained at baseline, immediately before balloon inflation, and immediately preceding balloon deflation, and the duration of balloon inflation was recorded. ST-segment deviation was measured manually in at least six ECG leads, including a precordial lead. Ischaemia was defined as any ST deviation of 1 mm or more in any lead.<sup>21</sup>

### Statistics

Descriptive statistics were used to characterize the sample, number of symptoms, and the frequency of reporting symptoms. The Mann–Whitney *U* test was used to compare the number of symptoms reported because of positive skewness. Bivariate analysis for sex differences in each reported symptom was conducted using either the  $\chi^2$  or Fisher's exact test. To establish potential symptom predictors (other than sex), each symptom having a sex difference nearing statistical significance ( $\leq 0.25$ )<sup>24</sup> was subjected to further bivariate analysis of its relationship with clinical, demographic, and treatment characteristics: education, immigrant status, body mass index, procedure urgency, Canadian Cardiovascular Society (CCS) classification, procedure indication, renal dysfunction, pre-existing heart failure, pulmonary, liver/gastrointestinal disease, malignancy, hypertension, hyperlipidaemia, diabetes, peripheral vascular disease, cerebrovascular disease, smoking

status, prior MI, prior PCI, prior coronary artery bypass grafting, and medications received within past 24 h [ $\beta$ -blockers, intravenous nitroglycerin, long-acting nitrates, calcium antagonists, lipid-lowering agents, angiotensin-converting enzyme (ACE) inhibitors, aspirin, clopidogrel, glyburide, hormone replacement therapy, anticoagulants, antidepressants]. Variables nearing significance ( $\leq 0.25$ ) were entered *en bloc* into a multivariate logistic regression model as potential predictors. Step-wise trimming of variables that were non-contributory (significance of  $>0.05$ ) produced the most parsimonious model. To ensure that the final model was reliable, the minimum requirement of 10 events per predictor variable was met.<sup>25</sup>

All analyses were conducted using the Statistical Package for the Social Sciences, version 16.0 (SPSS, Inc., Chicago, IL, USA). Power analysis indicated that, given a prevalence of chest or typical discomfort of 70% in men<sup>26</sup> ( $\alpha = 0.05$ ) a sample of 160 men and 160 women would provide 80% power to detect a statistically significant difference of  $\sim 15\%$  ( $\alpha = 0.05$ ).<sup>27</sup>

## Results

### Sample characteristics

After receiving approval from local research ethics boards, the study was conducted over 51 months, ending in February 2008. Of 820 patients screened, 775 (94.5%) met inclusion criteria, of which 560 (72.3%) consented. Of those, 235 (42%) were ineligible after angiography: (PCI not undertaken,  $n = 140$ ; occluded target,  $n = 95$ ). Twenty subjects were excluded because of incomplete ECG data ( $n = 13$ ), incomplete interview data ( $n = 5$ ), or aborted PCI ( $n = 2$ ), yielding a final sample of 305 participants.

One hundred fifty-eight (51.8%) subjects were exposed to balloon inflation of  $>60$  s and 120 (39.3%) had  $<60$  s [median (Mdn) 38 s, inter-quartile range (IQR) 23.5]; duration data were missing in 27 subjects. Of those with duration  $>60$  s, two men had ventricular arrhythmias converted with a single countershock. There were no sex differences in the rate of complications. Reasons for early deflation were: worsening discomfort (12), worsening ST elevation (15), haemodynamic instability (1), premature ventricular contractions (1), and operator choice (2), but no reason for early deflation was reported in 89 cases. We examined all those who had early deflation but no ischaemia, and found there were no statistically significant sex/gender differences in frequencies. That is, women were not more likely than men to have inappropriate early deflation (i.e. for reasons other than ECG-verified ischaemia). In comparing the participants for whom no reason for early deflation was recorded with those for whom a reason was noted, differences were found only in the procedural urgency rating; those with no reason recorded were more likely to be 'urgent' cases.

Baseline characteristics are provided in Tables 1 and 2. Most were Canadian-born (70.5%), and spoke English as their first language (78.7%). Fifty-three per cent had CCS class III or IV angina and 54.5% were undergoing angiography and PCI on an urgent inpatient basis. Women were older [65.8 (SD: 11.6) vs. 62.8 (SD: 9.9) years  $P = 0.02$ ] and were more likely to have a history of hypertension, cerebrovascular disease, or evidence of renal dysfunction.

### Number of reported symptoms

Most subjects (75.7%) reported symptoms during balloon inflation. Women had significantly shorter balloon inflations (63.7 s vs. 73.6;

**Table 1** Baseline characteristics, by sex

| Characteristic                               | All (N = 305) | Women (n = 121) | Men (n = 184) | P-value |
|----------------------------------------------|---------------|-----------------|---------------|---------|
| Socio-demographic                            |               |                 |               |         |
| Age, mean (SD)                               | 63.9 (10.7)   | 65.8 (11.6)     | 62.8 (9.9)    | 0.02    |
| English as first language [n (%)]            | 240 (78.7)    | 94 (77.7)       | 146 (79.3)    | 0.73    |
| Immigrant to Canada [n (%)]                  | 90 (29.5)     | 28 (23.1)       | 62 (33.7)     | 0.05    |
| Highest education (%)                        |               |                 |               |         |
| Secondary or less                            | 160 (52.4)    | 70 (57.9)       | 90 (48.9)     | 0.10    |
| Post-secondary                               | 145 (47.6)    | 51 (42.1)       | 94 (51.0)     |         |
| Clinical                                     |               |                 |               |         |
| CCS angina class III or IV [n (%)]           | 163 (53.4)    | 63 (52.1)       | 100 (54.3)    | 0.46    |
| Urgency of procedure [n (%)]                 |               |                 |               |         |
| Elective                                     | 139 (45.6)    | 55 (45.5)       | 84 (45.7)     | 0.97    |
| Urgent                                       | 166 (54.4)    | 66 (54.5)       | 100 (54.4)    |         |
| Indication for procedure [n (%)]             |               |                 |               |         |
| ACS                                          | 131 (43.0)    | 53 (43.8)       | 78 (42.4)     | 0.81    |
| Stable angina/CAD                            | 174 (57.0)    | 68 (56.2)       | 106 (57.6)    | 0.84    |
| Prior MI [n (%)]                             | 109 (35.7)    | 38 (31.4)       | 71 (38.6)     | 0.20    |
| Prior revascularization [n (%)]              |               |                 |               |         |
| PCI                                          | 72 (23.6)     | 28 (23.1)       | 44 (23.9)     | 0.88    |
| CABG                                         | 18 (5.9)      | 5 (4.1)         | 13 (7.1)      | 0.28    |
| Diabetes [n (%)]                             |               |                 |               |         |
| Type I                                       | 2 (0.7)       |                 | 2 (1.1)       | 0.15    |
| Type II                                      | 58 (19.0)     | 20 (16.6)       | 38 (20.7)     | 0.37    |
| Hypertension                                 | 198 (64.9)    | 88 (72.7)       | 110 (59.8)    | 0.02    |
| Peripheral vascular disease                  | 32 (10.5)     | 14 (11.6)       | 18 (9.8)      | 0.62    |
| Cerebrovascular disease                      | 22 (7.2)      | 14 (11.6)       | 8 (4.3)       | 0.02    |
| eGFR $\leq 60$ mL/min/1.73 m <sup>2a,b</sup> | 68 (22.3)     | 42 (34.7)       | 26 (14.1)     | <0.001  |
| Hypercholesterolaemia                        | 215 (70.5)    | 87 (69.6)       | 128 (71.9)    | 0.66    |
| Liver/gastrointestinal disease               | 38 (12.5)     | 19 (15.7)       | 19 (10.3)     | 0.17    |
| Pulmonary disease                            | 18 (5.9)      | 11 (9.1)        | 7 (3.8)       | 0.06    |
| Malignancy                                   | 42 (13.8)     | 18 (14.9)       | 24 (13.0)     | 0.20    |

CCS, Canadian Cardiovascular Society; ACS, acute coronary syndrome; CAD, coronary artery disease; MI, myocardial infarction; PCI, percutaneous coronary intervention; CABG, coronary artery bypass graft surgery.

<sup>a</sup>Calculated using Cockcroft–Gault formula.

<sup>b</sup>Some missing data.

$t = 2.99$ ,  $P = 0.003$ ), but the rate of reporting at least one symptom did not differ significantly between men and women (73.9 vs. 80.2%;  $\chi^2 = 1.61$ ,  $P = 0.21$ ). During the baseline interview, women recalled a greater number of prior ischaemic symptoms than did men (Mdn 4, IQR 3, vs. Mdn 3, IQR 3,  $P = 0.01$ ). However, no difference in the number of symptoms reported during inflation was observed (Mdn 1, IQR 2, vs. Mdn 1, IQR 2,  $P = 0.06$ ) (Supplementary material online, Table S1).

## Location of reported symptoms during inflation

The raw data consisted of 202 unique symptom descriptors. Grouping of similar descriptors yielded 49 symptoms of which 21 were described as the 'main' discomfort.

## Unadjusted sex-specific findings

Chest discomfort was the most commonly reported symptom overall (54.8%) (Table 3). There was no significant difference between men and women in this, whether including only symptoms reported as the 'main' symptom, or all reported symptoms. The overall prevalence of symptoms typical of myocardial ischaemia was 69.8% (Table 4). Analysis, including either only main symptoms, or all reported symptoms, indicated no significant difference between men and women. Two symptoms were statistically significantly more prevalent in women: jaw/teeth/throat or neck discomfort, and reporting only non-chest-pain discomfort.

## Adjusted sex-specific findings

Symptoms with fewer than five reports or those not reaching statistical significance of  $<0.25$  in bivariate analysis were not included (Table 5). Adjustment for covariates did not substantially change

**Table 2** Procedural characteristics, by sex

| Characteristic                            | All (N = 305) | Women (n = 121) | Men (n = 184) | P-value |
|-------------------------------------------|---------------|-----------------|---------------|---------|
| First vessel treated [n (%)]              |               |                 |               |         |
| Left anterior descending                  | 115 (37.6)    | 44 (36.3)       | 71 (38.6)     | 0.88    |
| Diagonal                                  | 8 (2.6)       | 4 (3.4)         | 4 (2.2)       | 0.86    |
| Ramus                                     | 8 (2.6)       | 4 (3.3)         | 4 (2.2)       | 0.55    |
| Circumflex                                | 44 (14.4)     | 13 (10.8)       | 31 (16.8)     | 0.13    |
| Obtuse marginal                           | 27 (9.0)      | 10 (8.3)        | 17 (9.1)      | 0.97    |
| Right coronary                            | 100 (32.9)    | 45 (37.1)       | 55 (29.8)     | 0.24    |
| Posterior descending                      | 3 (1.0)       | 1 (0.8)         | 2 (1.1)       | 0.82    |
| % Stenosis                                |               |                 |               |         |
| Pre-PCI, mean (SD) (n = 299)              | 83.0 (15.8)   | 82.0 (16.5)     | 83.7 (15.3)   | 0.37    |
| Post-PCI, mean (SD) (n = 292)             | 4.0 (10.5)    | 4.6 (9.7)       | 3.5 (11.1)    | 0.41    |
| TIMI flow grade [n (%)] (n = 275)         |               |                 |               |         |
| Pre-PCI                                   |               |                 |               |         |
| 3                                         | 248 (81.3)    | 106 (87.6)      | 142 (77.2)    | 0.29    |
| Post-PCI                                  |               |                 |               |         |
| 3                                         | 270 (88.5)    | 112 (92.6)      | 158 (85.9)    | 0.35    |
| Balloon inflation duration (s), mean (SD) | 71.9 (31.8)   | 63.7 (37.1)     | 77.6 (40.8)   | <0.01   |

PCI, percutaneous coronary intervention; TIMI, Thrombolysis in Myocardial Infarction.

**Table 3** Prevalence of chest discomfort, main or ever-reported symptom, during balloon inflation

| Sex             | Chest discomfort as main symptom [n (%)] (95% CI) | P-value | Chest discomfort ever-reported [n (%)] (95% CI) | P-value |
|-----------------|---------------------------------------------------|---------|-------------------------------------------------|---------|
| All (N = 305)   | 167 (54.8) (45.4–65.5)                            | 0.66    | 177 (58.0) (45.4–65.5)                          | 0.60    |
| Women (n = 121) | 64 (52.9) (45.4–65.5)                             |         | 68 (56.2) (45.4–65.5)                           |         |
| Men (n = 184)   | 103 (56.0) (45.4–65.5)                            |         | 109 (59.2) (45.4–65.5)                          |         |

CI, confidence interval.

the finding for jaw/teeth/throat or neck discomfort [adjusted odds ratio (OR) 2.91; 95% confidence interval (CI) 1.58–5.37], but female sex was no longer predictive of reporting *only* non-chest pain discomfort (adjusted OR: 1.76; 95% CI: 0.91–3.40) after adjustment for co-variables, specifically immigration status, co-morbid peripheral vascular, renal or liver/gastrointestinal disease, and prior use of clopidogrel. Restricting the analysis to subjects with ECG-confirmed ischaemia (n = 245) did not change the findings substantially, although after adjustment, female sex was a stronger predictor of jaw/teeth/throat or neck discomfort (adjusted OR: 4.55; 95% CI: 2.31–8.98) than in the whole sample, and remained a significant predictor of reporting *only* non-chest discomfort (adjusted OR: 2.11; 95% CI: 1.09–4.09). Factors that decreased the odds of reporting chest or typical symptoms were: co-morbid peripheral vascular disease, increasing age, and current clopidogrel therapy. Having immigrated to Canada increased the odds of reporting chest discomfort. Factors that increased the odds of reporting *only* non-chest

discomfort were peripheral vascular disease and current clopidogrel therapy. Increased reporting of jaw/teeth/throat or neck discomfort was associated with peripheral vascular disease and current clopidogrel, whereas decreased reporting of jaw/teeth/throat or neck discomfort was predicted by having been an immigrant to Canada.

## Discussion

This study is the first to prospectively examine sex-specific ischaemic cardiac symptoms caused by intentional transient reduction in regional coronary blood flow. We found no statistically significant differences in the frequency of ischaemia-induced chest discomfort or other typical ischaemic symptoms among women vs. men. However, women were significantly more likely to report throat, jaw and neck discomfort. No differences in frequency of back discomfort, a commonly cited sex difference, were found.

**Table 4** Prevalence of 'typical' symptoms, main or ever-reported, during balloon inflation

| Sex             | 'Typical' <sup>a</sup> symptoms as main symptom [n (%)] (95% CI) | P-value | 'Typical' symptoms ever-reported [n (%)] (95% CI) | P-value |
|-----------------|------------------------------------------------------------------|---------|---------------------------------------------------|---------|
| All (N = 305)   | 199 (65.2) (55.53–75.14)                                         | 0.47    | 212 (69.5) (55.53–75.14)                          | 0.82    |
| Women (n = 121) | 76 (62.8) (55.53–75.14)                                          |         | 85 (70.2) (65.91–84.49)                           |         |
| Men (n = 184)   | 123 (66.8) (55.53–75.14)                                         |         | 127 (69.0) (55.53–75.14)                          |         |

CI, confidence interval.

<sup>a</sup>Chest, arm(s), shoulder, jaw, back or epigastric discomfort; shortness of breath; diaphoresis; weakness; indigestion; nausea and/or vomiting; dizziness and/or lightheadedness; fear or restlessness.**Table 5** Association of sex with selected symptoms reported during balloon inflation (men as referent)

| Discomfort or symptom     | Sex                 |                   | Unadjusted OR (95% CI)         | Adjusted OR (95% CI)                                         |
|---------------------------|---------------------|-------------------|--------------------------------|--------------------------------------------------------------|
|                           | Women (%) (n = 121) | Men (%) (n = 184) |                                |                                                              |
| Localized discomfort      |                     |                   |                                |                                                              |
| Chest                     | 69 (57.0)           | 111 (60.3)        | 0.87 (0.55–1.40)               | 1.21 (0.71–2.06) <sup>A, IMGR, PVD, CRB, CABG, GI, CLP</sup> |
| Arms (either/both)        | 11 (9.1)            | 17 (9.2)          | 0.98 (0.44–2.18)               | — <sup>b</sup>                                               |
| Throat, jaw/teeth or neck | 48 (38.0)           | 32 (17.4)         | 2.64 (1.53–4.57)               | 2.91 (1.58–5.37) <sup>A, IMMIG, CCS, PVD, CLP</sup>          |
| Back/intrascapular        | 5 (4.1)             | 7 (3.8)           | 1.09 (0.34–3.52) <sup>a</sup>  | — <sup>b</sup>                                               |
| Epigastric/indigestion    | 2 (1.7)             | 3 (1.6)           | 1.01 (0.17–6.16) <sup>a</sup>  | — <sup>c</sup>                                               |
| Non-localized symptoms    |                     |                   |                                |                                                              |
| Diaphoresis               | 4 (3.3)             | 3 (1.6)           | 2.06 (0.45–9.38) <sup>a</sup>  | — <sup>c</sup>                                               |
| SOB                       | 3 (2.5)             | 0                 | —                              | — <sup>c</sup>                                               |
| Weakness                  | 2 (1.7)             | 2 (1.1)           | 1.53 (0.21–11.01) <sup>a</sup> | — <sup>c</sup>                                               |
| Nausea/vomiting           | 2 (1.7)             | 6 (3.3)           | 0.50 (0.09–2.51) <sup>a</sup>  | — <sup>c</sup>                                               |
| Dizziness                 | 2 (1.7)             | 1 (0.5)           | 3.08 (0.28–34.30) <sup>a</sup> | — <sup>c</sup>                                               |
| Restlessness/fear         | 0                   | 0                 | —                              | — <sup>c</sup>                                               |
| Grouped symptoms          |                     |                   |                                |                                                              |
| Only non-chest discomfort | 29 (24.0)           | 27 (14.7)         | 1.83 (1.02–3.29)               | 1.76 (0.91–3.40) <sup>IMGR, PVD, GI, CLP</sup>               |
| Any 'typical' symptoms    | 85 (70.2)           | 127 (69.0)        | 1.06 (0.64–1.75)               | 1.63 (0.89–2.96) <sup>PVD, CRB, PCI, LL</sup>                |
| No discomfort             | 24 (19.8)           | 48 (26.1)         | 0.70 (0.40–1.22)               | 0.63 (0.35–1.14) <sup>A, LL</sup>                            |

OR, odds ratio; CI, confidence interval; SOB, shortness of breath.

Significant co-variables: <sup>A</sup>age; <sup>CCS</sup>Canadian Cardiovascular Society class <sup>CLP</sup>clopidogrel; <sup>CRB</sup>cerebrovascular disease; <sup>GI</sup>GI/liver disease; <sup>IMGR</sup>immigrant; <sup>LL</sup>lipid-lowering therapy; <sup>PCI</sup>prior percutaneous coronary intervention; <sup>PVD</sup>peripheral vascular disease.<sup>a</sup>Exact Fisher CI (expected cell frequency <5).<sup>b</sup>Adjusted analyses not reported if unadjusted  $P \geq 0.25$ .<sup>c</sup>Adjusted analysis not undertaken for event rates <10.

## Sex differences in rates of chest discomfort or typical symptoms not found

Chest discomfort is the most widely recognized symptom of myocardial ischaemia, relied upon by both health professionals and the public.<sup>26,28–30</sup> Sex-based differences in this symptom could have broad clinical and public health implications.

The similarity we observed between men and women in the frequency of chest discomfort and typical symptoms differs from some previous reports. A review of studies relying upon symptom recall found fewer women presented with chest discomfort than did men.<sup>26</sup> However, several recent symptom-recall

studies, using both prospective and retrospective methods, have yielded no sex differences in this symptom<sup>31–37</sup> and others, after adjusting for age, have found no sex differences in chest discomfort.<sup>1,3–5,7,38,39</sup> Importantly, most of the aforementioned studies used retrospective review of health records or non-open-ended questionnaires (only allowing a pre-specified list of responses) administered days to weeks after the event. Closed, checklist-style questionnaires may favour reporting of more classical symptoms, and might discourage reporting symptoms not thought (by either patient or provider) to be typical. We note that, of 14 studies using open methods,<sup>33,34,36,40–42</sup> all found no sex differences, whereas only two of eight studies using closed methods<sup>35,37</sup> found no differences.



Our prospective design, using consistent, iterative interrogation of symptoms *during* ischaemic episodes, eliminates recall bias. Our open-ended questioning may have aided more complete symptom reporting, thereby reducing sex/gender differences.<sup>43</sup> Finally, collection of electrocardiographic data during coronary occlusion to verify ischaemia overcomes another previously cited limitation.

Collateral flow, ischaemic pre-conditioning, and prior infarction may mitigate the development of ischaemia during temporary obstruction of coronary flow during balloon angioplasty. Therefore, we examined our findings within the subgroup of 245 patients with electrocardiographically evident ischaemia during balloon inflation. Men and women did not differ with respect to ST changes, and there were no statistically significant sociodemographic or clinical differences between those with and without electrocardiographic ischaemia, though others have reported that ischaemia during PCI is more frequent and causes greater ST deviation in women.<sup>44,45</sup> Our findings of no sex differences in *objective* ischaemia may be due to the shorter inflation times to which the women were exposed. Notably though, our findings of no sex differences in chest or other typical symptoms were unchanged by this narrower analysis.

## Women report greater number of symptoms

Our observation at baseline that women recall more previous symptoms than men is concordant with the findings from studies in which data are based solely upon recall. Moreover, the differential we observed between recalled and prospectively triggered symptoms implies that women are more likely to report symptoms that are not actually part of their true ischaemic symptom array. It is possible though that the statistically significantly greater number of reported symptoms by women at baseline would have also been evident during balloon inflation if women had been exposed to inflations of equal duration. It has been previously suggested that women with ACS report more symptoms than men,<sup>40,42,46</sup> although such analyses have been infrequent. However, others have reported no differences.<sup>32,41,47,48</sup> Psychosocial factors [e.g. socially prescribed gender roles, including the gender of the interviewer (research assistants in this study were predominantly women), different coping mechanisms, higher levels of anxiety, and higher prevalence of depression] may influence women's tendency to report higher pain intensity,<sup>49</sup> and may similarly explain the greater number of reported symptoms. Open- vs. closed-ended questioning, as mentioned, may also affect the number of symptoms reported.

## Other symptoms

Throat, jaw, and neck discomfort were reported more by women, which is consistent with many previous studies.<sup>2,26,34–37,46,48,50,51</sup> The observation that women have greater vagal activity than men,<sup>52</sup> and that the jaw area is innervated by the vagus nerve<sup>53,54</sup> may be clues to the mechanism underlying this observation.

As noted, women had shorter mean duration of balloon inflation than men and so were less likely to have had the full opportunity to develop ischaemia and symptoms. Consequently, it is possible that with longer duration, differential symptom profiles would have

emerged. Further study is warranted to ascertain whether this is the case.

## Limitations

We did not measure gender in this study, though it is acknowledged that gender (e.g. socially or culturally prescribed experiences of 'femaleness' or 'maleness'),<sup>55</sup> as opposed to sex (biological characteristics such as anatomy)<sup>56</sup> differences may explain some of the observed differences. We may have had insufficient statistical power to detect some sex differences. However, the upper bounds of the odds ratio confidence intervals for chest pain were not large, suggesting that such differences, if present, are small, difficult to detect, and unlikely to be relevant in the assessment and management of individual patients. Studying a cohort referred for angiogram may have introduced biases, because those not referred may have had a higher prevalence of atypical symptoms.<sup>57</sup> The duration of ischaemia induced during PCI is shorter than that of ACS or STEMI,<sup>21</sup> and longer-lasting ischaemia might have elicited different or more symptoms. No measures of depression or anxiety were incorporated in the study, which have both been shown to be positively associated with pain.<sup>49</sup> Because we did not systematically collect data about reasons for early balloon deflation, the extent to which other differences may have been present in this subset, and been a source of bias, is unknown. Finally, although our questionnaire possesses strong content-related validity, evidence for other types of validity has not yet been established.

## Conclusions

In this sample of patients undergoing non-emergent PCI, no statistically significant differences were found between men and women in the prevalence of reporting chest or most other typical symptoms. However, the findings revealed that women reported throat and jaw discomfort significantly more often than men. These findings add to the evidence that women report the typical symptoms of myocardial ischaemia with similar frequency to men. Efforts to emphasize differences between men's and women's symptoms of ischaemic heart disease, although well-intentioned, may be misguided.

## Supplementary material

Supplementary material is available at *European Heart Journal* online.

## Funding

This research was funded by the British Columbia Medical Services Foundation. During the conduct of this research, Dr M.H.M. was supported by a fellowship from the Canadian Institutes of Health Research and Dr P.A.R. held a Senior Scholar award from the Michael Smith Foundation for Health Research.

**Conflict of interest:** none declared.

## References

1. Canto JG, Shlipak MG, Rogers WJ, Malmgren JA, Frederick PD, Lambrew CT, Ornato JP, Barron HV, Kiefe CI. Prevalence, clinical characteristics, and mortality

- among patients with myocardial infarction presenting without chest pain. *J Amer Med Assoc* 2000;**283**:3223–3229.
2. Culic V, Eterovic D, Miric D, Silic N. Symptom presentation of acute myocardial infarction: influence of age, sex and risk factors. *Amer Heart J* 2002;**144**: 1012–1017.
  3. Brieger D, Eagle KA, Goodman SG, Steg PG, Budaj A, White K, Montalescot G. Acute coronary syndromes without chest pain, an underdiagnosed and undertreated high-risk group: insights from the Global Registry of Acute Coronary Events. *Chest* 2004;**126**:461–469.
  4. Milner KA, Vaccarino V, Arnold AL, Funk M, Goldberg RJ. Gender and age differences in chief complaints of acute myocardial infarction (Worcester Heart Attack Study). *Am J Cardiol* 2004;**93**:606–608.
  5. Goldberg RJ, O'Donnell C, Yarzebski J, Bigelow C, Savageau J, Gore JM. Sex differences in symptom presentation associated with acute myocardial infarction: a population-based perspective. *Amer Heart J* 1998;**136**:189–195.
  6. Canto JG, Fincher C, Kiefe CI, Allison JJ, Li Q, Funkhouser E, Centor RM, Selker HP, Weissman NW. Atypical presentations among medicare beneficiaries with unstable angina pectoris. *Am J Cardiol* 2002;**90**:248–253.
  7. Stern S, Behar S, Leor J, Harpaz D, Boyko V, Gottlieb S, for the Israeli Working Group on Intensive Cardiac Care, Israel Heart Society. Presenting symptoms, admission electrocardiogram, management, and prognosis in acute coronary syndromes: differences by age. *Amer J Geriatr Cardiol* 2004;**13**:188–196.
  8. Shaw LJ, Gibbons RJ, McCallister B, Mitchell KR, Hewitt K, Klein LW, Weintraub WS, Shaw RE. Gender differences in extent and severity of coronary disease in the ACC National Cardiac Disease registry. *J Amer Coll Cardiol* 2002;**39**: 321A.
  9. Bairey Merz N, Bonow RO, Sopko G, Balaban RS, Cannon RO III, Gordon D, Hand MM, Hayes SN, Lewis JF, Long T, Manolio TA, Maseri A, Nabel EG, Desvigne Nickens P, Pepine CJ, Redberg RF, Rossouw JE, Selker HP, Shaw LJ, Waters DD, Endorsed by the American College of Cardiology Foundation. Women's Ischemic Syndrome Evaluation: current status and future research directions: report of the National Heart, Lung and Blood Institute workshop: October 2–4, 2002: executive summary. *Circulation* 2004;**109**:805–807.
  10. Dorsch MF, Lawrance RA, Sapsford RJ, Durham N, Oldham J, Greenwood DC, Jackson BM, Morrell C, Robinson MB, Hall AS. Poor prognosis of patients presenting with symptomatic myocardial infarction but without chest pain. *Heart* 2001;**86**:494–498.
  11. Dracup K, Moser DK. Treatment-seeking behaviour among those with signs and symptoms of acute myocardial infarction. *Heart Lung* 1991;**20**:570–575.
  12. Lefler LL, Bondy KN. Women's delay in seeking treatment with myocardial infarction: a meta-synthesis. *J Cardiovasc Nurs* 2004;**19**:251–268.
  13. Meischke H, Ho MT, Eisenberg MS, Schaeffer SM, Larsen MP. Reasons patients with chest pain delay or do not call 911. *Ann Emerg Med* 1995;**25**: 193–197.
  14. Ottesen MM, Kober L, Jorgensen S, Torp-Pedersen C. Determinants of delay between symptoms and hospital admission in 5978 patients with acute myocardial infarction. *Eur Heart J* 1996;**17**:429–437.
  15. D'Antonio B, Dupuis G, Fortin C, Arsenault A, Burelle D. Detection of exercise-induced myocardial ischemia from symptomatology experienced during testing in men and women. *Can J Cardiol* 2006;**22**:411–417.
  16. D'Antonio B, Dupuis G, Arsenault A, Burelle D. Silent ischemia: silent after all? *Can J Cardiol* 2008;**24**:285–291.
  17. Rentrop KP, Cohen M, Blanke H, Phillips RA. Changes in collateral channel filling immediately after controlled coronary artery occlusion by an angioplasty balloon in human subjects. *J Am Coll Cardiol* 1985;**5**:587–592.
  18. Traupe T, Gloekler S, de Marchi SF, Werner GS, Seiler C. Assessment of the human coronary collateral circulation. *Circulation* 2010;**122**:1210–1220.
  19. Werner GS, Fritzenwanger M, Prochnau D, Schwarz G, Ferrari M, Aarnoudse W, Pijls NHJ, Figulla HR. Determinants of coronary steal in chronic total coronary occlusions: donor artery, collateral, and microvascular resistance. *J Am Coll Cardiol* 2006;**48**:51–58.
  20. Zimarino M, Ausiello A, Contegiacomo G, Riccardi I, Renda G, Di Iorio C, De Caterina R. Rapid decline of collateral circulation increases susceptibility to myocardial ischemia: the trade-off of successful percutaneous recanalization of chronic total occlusions. *J Am Coll Cardiol* 2006;**48**:59–65.
  21. Anderson JL, Adams CD, Antman EM, Bridges CR, Califf RM, Casey DE Jr, Chavey NH, Fesmire FM, Hochman JS, Levin TN, Lincoff AM, Peterson ED, Theroux P, Wenger NK, Wright RS. ACC/AHA 2007 Guidelines for the management of patients with unstable angina/non-ST-elevation myocardial infarction: a report of the American College of Cardiology/American Heart Association Task Force on Practice Guidelines. *Circulation* 2007;**116**: e148–e304.
  22. Bassand JP, Hamm CW, Ardissino D, Boersma E, Budaj A, Fernandez-Aviles F, Fox KAA, Hasdai D, Ohman EM, Wallentin L, Wijns W. Guidelines for the diagnosis and treatment of non-ST-segment acute coronary syndromes. *Eur Heart J* 2007;**28**:1598–1660.
  23. The Task Force on the Management of Stable Angina Pectoris of the European Society of Cardiology. Guidelines on the management of stable angina pectoris. *Euro Heart J* 2006;**27**:1341–1381.
  24. Hosmer DW, Lemeshow S. *Applied Logistic Regression*. 2nd ed. New York: Wiley; 2004.
  25. Peduzzi P, Concato J, Kemper E, Holford TR, Feinstein AR. A simulation study of the number of events per variable in logistic regression analysis. *J Clin Epi* 1996;**49**: 1373–1379.
  26. Canto JG, Goldberg RJ, Hand MM, Bonow RO, Sopko G, Pepine CJ, Long T. Symptom presentation of women with acute coronary syndromes: Myth vs. reality. *Arch Int Med* 2007;**167**:2405–2413.
  27. Fleiss JL. Chapter 3. In: *Anonymous Statistical Methods for Rates and Proportions*. 2nd ed. New York: John Wiley & Sons; 1981.
  28. Fang J, Keenan N, Dai S, Denny C. Disparities in adult awareness of heart attack warning signs and symptoms—14 States, 2005. *MMWR* 2008;**57**: 175–179.
  29. McCarthy BD, Beshansky JR, D'Agostino RB, Selker HP. Missed diagnosis of acute myocardial infarction in the ED: results from a multicenter study. *Ann Emerg Med* 1993;**22**:579–582.
  30. Pope JH, Aufderheide TP, Ruthazer R, Woodlark RH, Feldman JA, Beshansky JR, Griffith JL, Selker HP. Missed diagnosis of acute cardiac ischemia in the ED. *New Eng J Med* 2000;**342**:1163–1170.
  31. Arslanian-Engoren C, Patel A, Fang J, Armstrong D, Kline-Rogers E, Duvernoy CS, Eagle KA. Symptoms of men and women presenting with acute coronary syndromes. *Am J Cardiol* 2006;**98**:1177–1181.
  32. DeVon HA, Ryan CJ, Ochs AL, Shapiro M. Symptoms across the continuum of acute coronary syndromes: differences between women and men. *Am J Critical Care* 2008;**17**:14–25.
  33. Omran S, Al-Hassan M. Gender differences in signs and symptoms presentation and treatment of Jordanian myocardial infarction patients. *Int J Nurs Pract* 2006;**12**:198–204.
  34. Thuresson M, Jarlov MB, Lindahl B, Svensson L, Zedigh C, Herlitz J. Symptoms and type of symptom onset in acute coronary syndrome in relation to ST elevation, sex, age, and a history of diabetes. *Am Heart J* 2005;**150**:234–242.
  35. Dey S, Flather GD, Brieger D, Gurfinkel EP, Steg PG, FitzGerald G, Jackson EA, Eagle KA, for the Grace Investigators. Sex-related differences in the presentation, treatment and outcomes among patients with acute coronary syndromes: the Global Registry of Acute Coronary Events. *Heart* 2009;**95**:20–26.
  36. Kosuge M, Kimura K, Ishikawa T, Ebina T, Hibi K, Tsukahara K, Kanna M, Iwahashi N, Okuda J, Nozawa N, Ozaki H, Yano H, Nakati T, Kusama I, Umemura S. Differences between men and women in terms of clinical features of ST segment acute myocardial infarction. *Circulation J* 2006;**70**:222–226.
  37. Lovlien M, Schei B, Gjengedal E. Are there gender differences related to symptoms of acute myocardial infarction? A Norwegian perspective. *Prog Cardiovasc Nurs* 2006;**21**:14–19.
  38. Bayer AJ, Chadha JS, Farag RR, Pathy MS. Changing presentation of myocardial infarction with increasing old age. *J Amer Geriatr Soc* 1986;**34**:263–266.
  39. Then KL, Rankin JA, Fofonoff DA. Atypical presentation of acute myocardial infarction in 3 age groups. *Heart Lung* 2001;**30**:285–293.
  40. DeVon HA, Zerwic JJ. The symptoms of unstable angina: do women and men differ? *Nurs Res* 2003;**52**:108–118.
  41. DeVon HA, Penckofer S, Larimer K. The association of diabetes and older age with the absence of chest pain during acute coronary syndrome. *West J Nurs Res* 2008;**30**:130–144.
  42. Milner KA, Funk M, Richards S, Wilmes RM, Vaccarino V, Krumholz HM. Gender differences in symptom presentation associated with coronary heart disease. *Am J Cardiol* 1999;**84**:396–399.
  43. Shin JY, Martin R, Howren B. Influence of assessment methods on reports of gender differences in AMI symptoms. *West J Nurs Res* 2009;**31**:553–568.
  44. Airaksinen KEJ, Ikaheimo MJ, Linnaluoto M, Tahvanainen KUO, Huikuri HV. Gender differences in autonomic and hemodynamic reactions to abrupt coronary occlusion. *J Amer Coll Cardiol* 1998;**31**:301–306.
  45. Jensen J, Eriksson SV, Lindvall B, Lundin P, Sylvén C. Women react with more myocardial ischemia and angina pectoris during elective percutaneous transluminal coronary angioplasty. *Coronary Art Dis* 2000;**11**:527–535.
  46. Granot M, Goldstein-Ferber S, Azzam ZS. Gender differences in the perception of chest pain. *J Pain Symptom Manage* 2004;**27**:149–155.
  47. King KB, McGuire MA. Symptom presentation and time to seek care in women and men with acute myocardial infarction. *Heart Lung* 2007;**36**:235–243.
  48. Lovlien M, Schei B, Hole T. Women with myocardial infarction are less likely than men to experience chest symptoms. *Scand Cardiovasc J* 2006;**40**:342–347.

49. Fillingim RB, King CD, Ribeiro-Dasilva MC, Rahim-Williams B, Riley JLI. Sex, gender, and pain: a review of recent clinical and experimental findings. *J Pain* 2009;**10**:447–485.
50. Chen W, Woods SL, Puntillo KA. Gender differences in symptoms associated with acute myocardial infarction: a review of the research. *Heart Lung* 2005;**34**: 240–247.
51. DeVon HA, Zerwic JJ. Symptoms of acute coronary syndromes: are there gender differences? A review of the literature. *Heart Lung* 2002;**31**:235–245.
52. Chambers AS, Allen JJB. Sex differences in cardiac vagal control in a depressed sample: implications for differential cardiovascular mortality. *Biol Psychol* 2007; **75**:32–36.
53. Foreman RD. Neurological mechanisms of chest pain and cardiac disease. *Cleveland Clinic J Med* 2007;**74**:S30–S33.
54. Mork AA, Haufe SMW, Yancey WB. Sometimes (what seems to be) a heart attack is (really) a pain in the neck. *J Amer Board Fam Prac* 2004;**17**:74–77.
55. Johnson JL, Greaves L, Repta R. *Better Science with Sex and Gender: A Primer for Health Research*. Vancouver: Women's Health Research Network; 2007.
56. Health Canada. *Exploring Concepts of Gender and Health*. Canada, Ottawa: Publications Health Canada; 2003.
57. Shaw LJ, Bairey Merz CN, Pepine CJ, Reis SE, Bittner V, Kelsey SF, Olson M, Johnson BD, Mankad S, Sharaf BL, Rogers WJ, Wessel TR, Arant CB, Pohost GM, Lerman A, Quyyumi AA, Sopko G, for the WISE Investigators. Insights from the NHLBI-sponsored Women's Ischemia Syndrome Evaluation (WISE) study. Part I: gender differences in traditional and novel risk factors, symptom evaluation, and gender-optimized diagnostic strategies. *J Amer Coll Cardiol* 2006;**47**:45–205.

## CARDIOVASCULAR FLASHLIGHT

doi:10.1093/eurheartj/ehr199

Online publish-ahead-of-print 28 June 2011

# Hypertensive crisis and end-organ damage induced by over-the-counter nasal decongestant abuse

Ian Buyschaert<sup>1</sup>, Jo Van Dorpe<sup>2</sup>, and Karl Dujardin<sup>1\*</sup>

<sup>1</sup>Department of Cardiology, Heilig Hart Ziekenhuis, Wilgenstraat 2, 8800 Roeselare, Belgium and <sup>2</sup>Department of Pathology, Heilig Hart Ziekenhuis, Wilgenstraat 2, 8800 Roeselare, Belgium

\* Corresponding author. Tel: +32 51 23 72 75, Email: [kdujardin@hhr.be](mailto:kdujardin@hhr.be)

A 34-year-old male presented with blurred vision and frontal headache since 2 months due to papilloedema and hypertensive retinopathy stage IV [Panel A, fluoroangiography showing peripapillary oedema, cotton wool spots (arrowhead), flame shaped haemorrhages (arrow)]. His blood pressure was 210/120 mmHg. He took no oral medication, but used xylometazoline nasal spray every 3 h the last 2 years for nasal congestion. He was admitted and treated with i.v. labetalol and urapidil.

Diagnostic workup for secondary hypertension was negative. Evaluation of end-organ damage showed concentric left ventricular hypertrophy (21 mm, Panel B). His serum creatinine was elevated (1.81 mg/dL, normal 0.67–1.17 mg/dL) with microalbuminuria (91 µg/24 h, normal <30 µg). Kidney biopsy showed hypertensive nephrosclerosis without active inflammation [Panel C, interstitial fibrosis, tubular atrophy, and glomerulus with global sclerosis (arrow); Panel D, glomerulus with dilated Bowman's space (arrowhead), arteriole with hyalinosis (arrow)].

The xylometazoline spray was replaced by topical fluticasone bid. The patient was discharged with blood pressure 135/75 mmHg on amlodipine 10 mg. However, his creatinine remained unchanged 1.80 mg/dL during follow-up.

Xylometazoline is an imidazoline-derived alpha-2 agonist available over the counter as long-acting topical nasal decongestant. Short-term use causes vasoconstriction and reduces congestion. However, long-term use can result in rebound nasal congestion and the vicious circle of rhinitis medicamentosa. Although short-term use of topical alpha-2 agonists has no systemic toxicity, long-term abuse has been reported to cause systemic vasoconstriction and severe cardiovascular complications. Here, we report a hypertensive emergency with retinopathy, irreversible renal damage, and left ventricular hypertrophy. This case demonstrates the important systemic toxicity of topical nasal decongestants and warns against their long-term abuse.

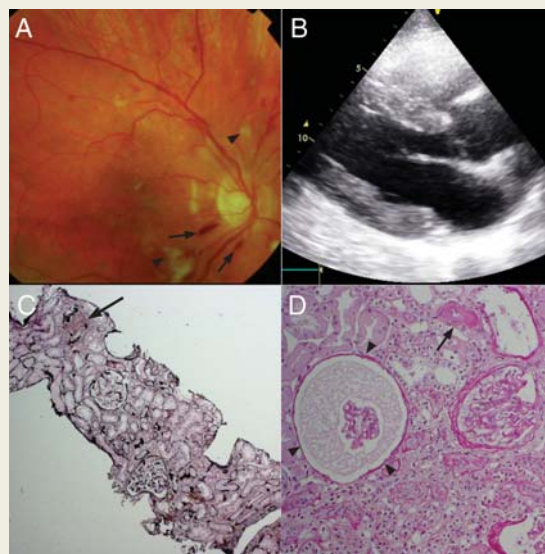

Source: http://academic.oup.com/eurheartj/article-pdf/32/24/3107/17049550/ehr358.pdf
